# Supplementary material for: Effects of adsorption onto silica sand particles on the hydrolysis of tetracycline antibiotics
Source: Royal Society of Chemistry journal article supplement (doi:10.1039/c2em10961a), 2012-01-01
Supplement: c2em10961a.pdf [file c2em10961a.pdf]

Electronic Supplementary Information for

**Effects of adsorption onto silica sand particles on the hydrolysis of tetracycline antibiotics**

Hyun-Joong Kang,<sup>a</sup> Mi-Young Lim<sup>b</sup> and Jung-Hwan Kwon<sup>\*a, b</sup>

<sup>a</sup>Department of Environmental Engineering and <sup>b</sup>Environmental Research Institute, Ajou University, Woncheon-dong, Yeongtong-gu, Suwon, 443-749, Republic of Korea.

\*Fax:+82 31 215 5145; Tel:+82 31 219 1942; E-mail: jhkwon@ajou.ac.kr

Contents:

**Figure ESI1.** Determination of pseudo-first order hydrolysis rate constants in batch experiments for tetracycline at (a) pH 5, (b) pH 7, and (c) pH 9, for oxytetracycline at (d) pH 5, (e) pH 7, and (f) pH 9, and for chlortetracycline at (g) pH 5, (h) pH 7, and (i) pH 9. Error bars denote the standard deviation of triplicate samples. They are not shown when they are smaller than the symbols.

**Figure ESI2.** Changes in the relative electrical conductivity of the effluent with increasing pore volume of 50 mg L<sup>-1</sup> NaCl solution. The volumetric flow rate was 1 mL min<sup>-1</sup>. The line represents the best-fit using equation 3 without degradation and adsorption.

**Figure ESI3.** Changes in the relative concentration ( $C/C_0$ ) of three tetracyclines in the column effluent at four different volumetric flow rates. (a: TC, 3.0 mL h<sup>-1</sup>, b: TC, 0.6 mL h<sup>-1</sup>, c: TC, 0.2 mL h<sup>-1</sup>, d: TC, 0.08 mL h<sup>-1</sup>, e: OTC, 3.0 mL h<sup>-1</sup>, f: OTC, 0.6 mL h<sup>-1</sup>, g: OTC, 0.2 mL h<sup>-1</sup>, h: OTC, 0.08 mL h<sup>-1</sup>, i: CTC, 3.0 mL h<sup>-1</sup>, j: CTC, 0.6 mL h<sup>-1</sup>, k: CTC, 0.2 mL h<sup>-1</sup>) Short-dashed lines indicate the expected break-through curve for a tracer (Cl<sup>-</sup>). Short-dashed and solid lines represent the modeled break-through curve by fitting only the retardation factor and both the retardation factor and the degradation rate constant in equation 3, respectively. Long-dashed lines indicate a theoretical break-through curve for a tracer.

**Figure ESI4.** The major transformation pathways of tetracyclines. Tetracycline and its transformation products: R5 = H, R7 = H; oxitetracycline and its transformation products: R5 = OH, R7 = H; chlortetracycline and its transformation products: R5 = H, R7 = Cl.

**Figure ESI5.** Bioluminescence inhibition of the three tetracycline effluents (flow rate = 0.08 mL h<sup>-1</sup>) in *Vibrio fischeri*. Filled and open circles represent the column influents and the effluents, respectively. Solids lines and dashed lines are best-fit sigmoidal curves for the determination of ED<sub>50</sub> for the influents and effluents.

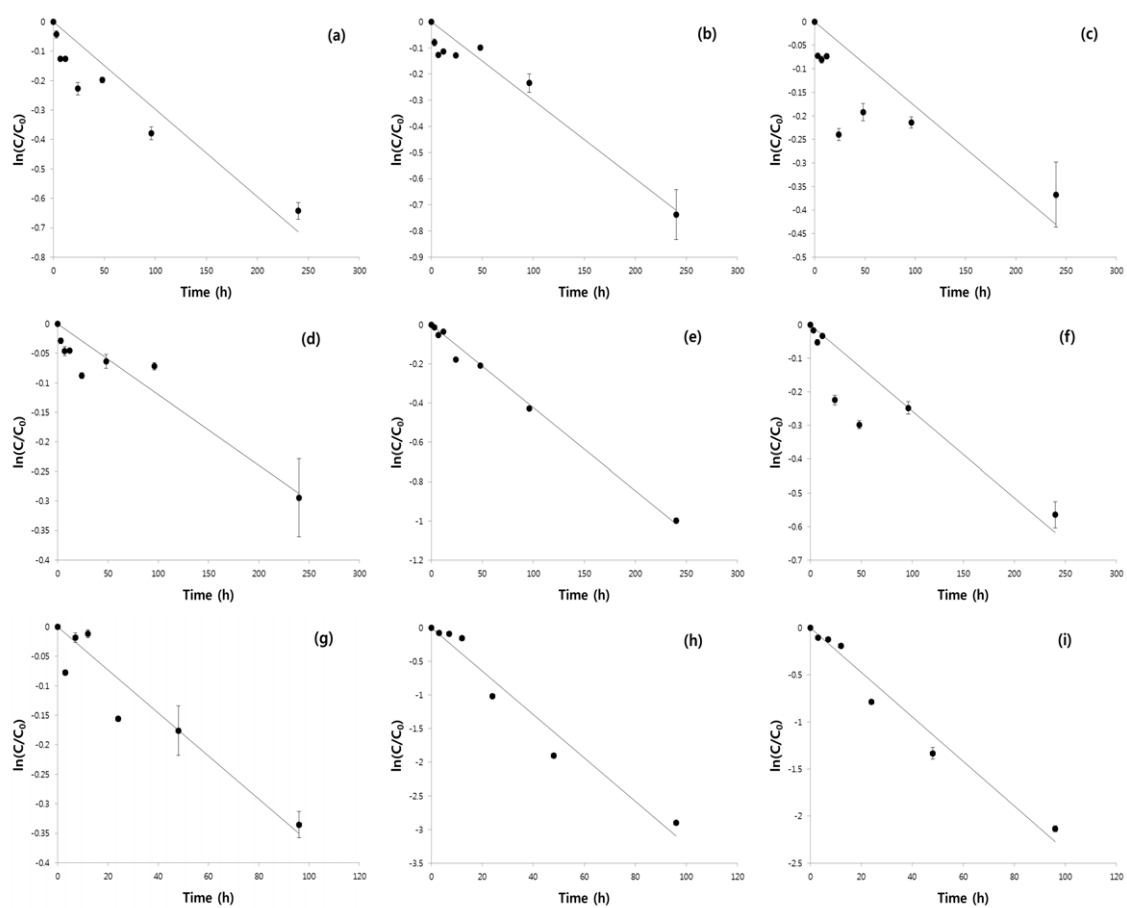

**Figure ESI1.** Determination of pseudo-first order hydrolysis rate constants in batch experiments for tetracycline at (a) pH 5, (b) pH 7, and (c) pH 9, for oxytetracycline at (d) pH 5, (e) pH 7, and (f) pH 9, and for chlortetracycline at (g) pH 5, (h) pH 7, and (i) pH 9. Error bars denote the standard deviation of triplicate samples. They are not shown when they are smaller than the symbols.

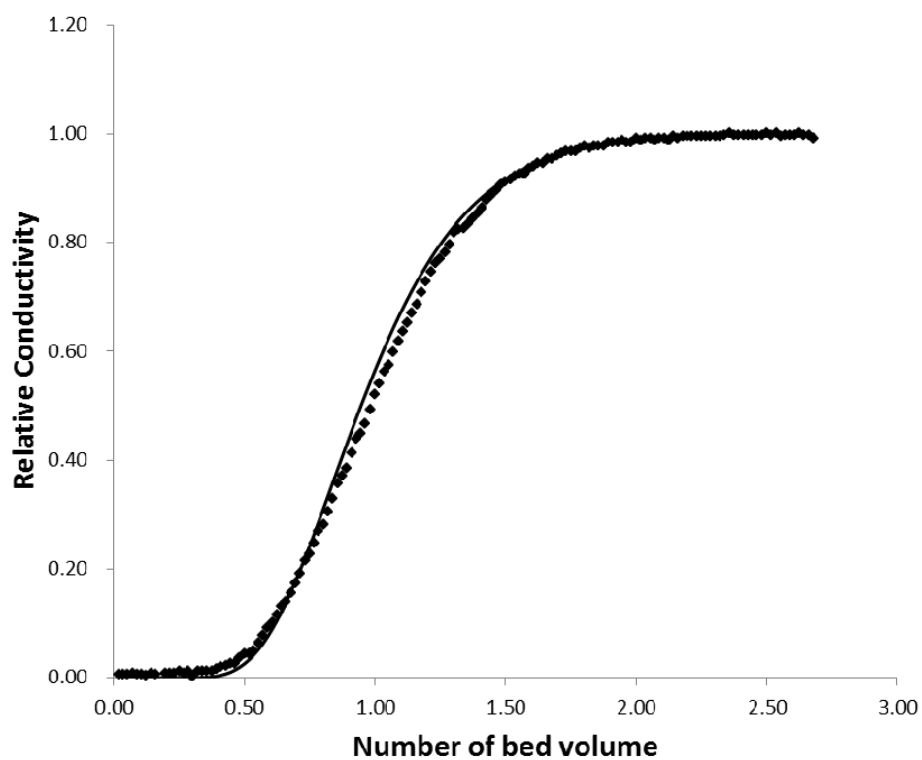

**Figure ESI2.** Changes in the relative electrical conductivity of the effluent with increasing pore volume of  $50 \text{ mg L}^{-1}$  NaCl solution. The volumetric flow rate was  $1 \text{ mL min}^{-1}$ . The line represents the best-fit using equation 3 without degradation and adsorption.

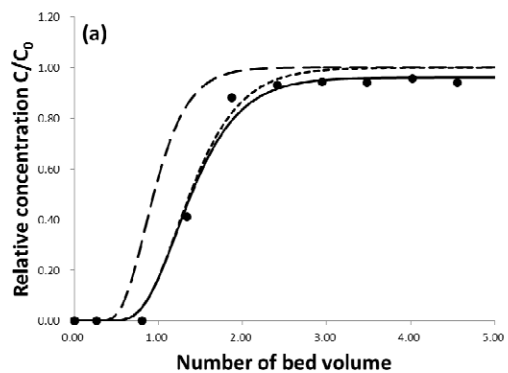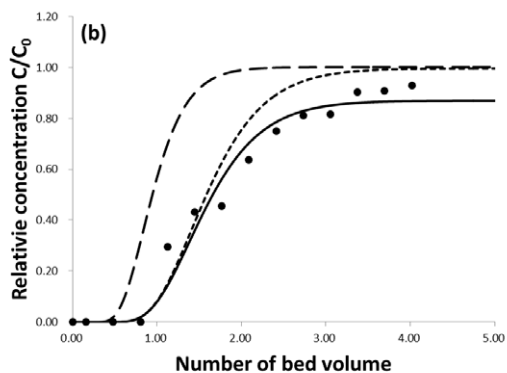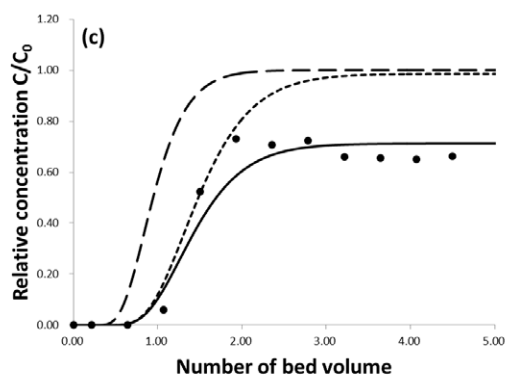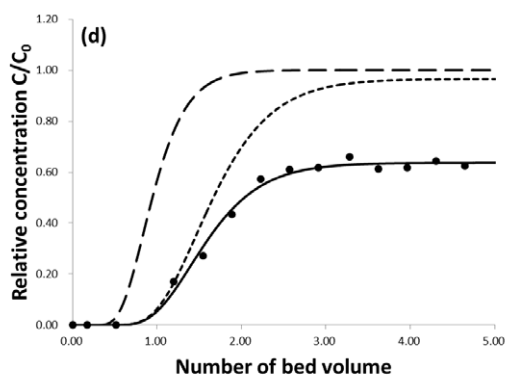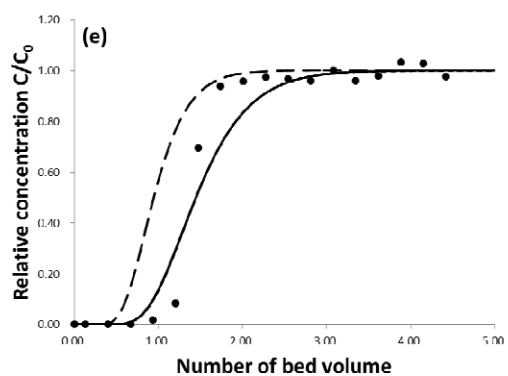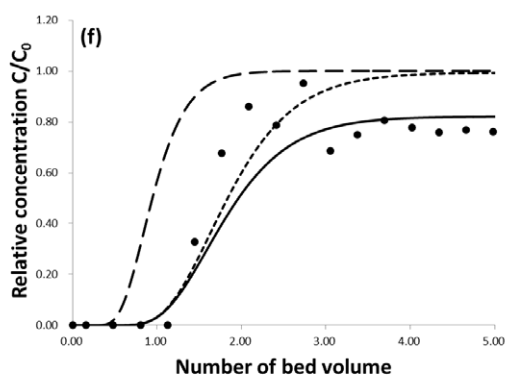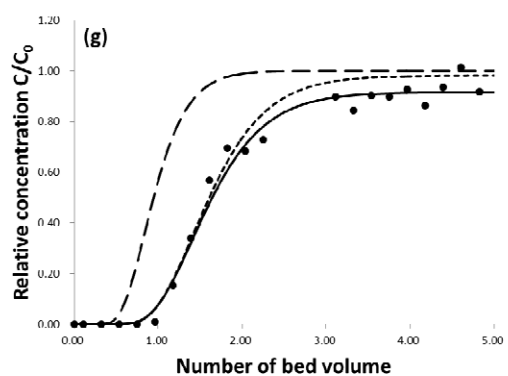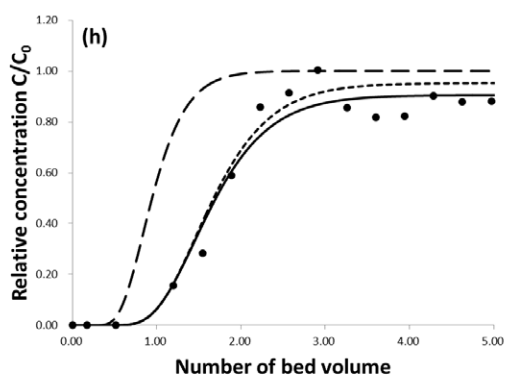

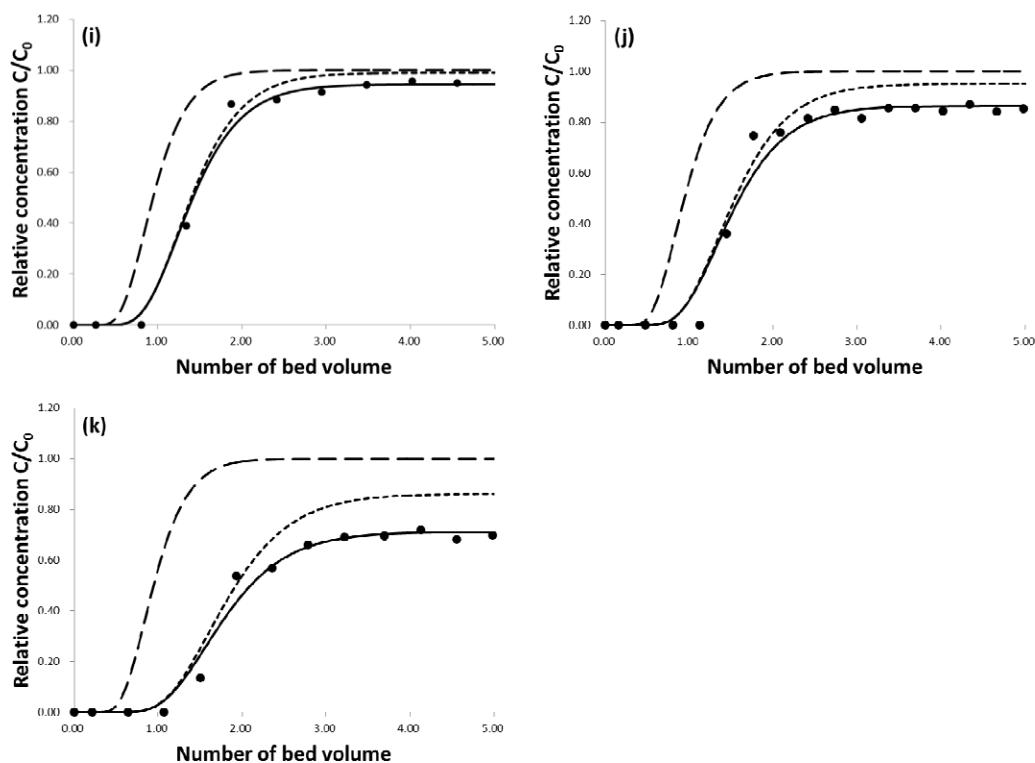

**Figure ESI3.** Changes in the relative concentration ( $C/C_0$ ) of three tetracyclines in the column effluent at four different volumetric flow rates. (a: TC, 3.0 mL h<sup>-1</sup>, b: TC, 0.6 mL h<sup>-1</sup>, c: TC, 0.2 mL h<sup>-1</sup>, d: TC, 0.08 mL h<sup>-1</sup>, e: OTC, 3.0 mL h<sup>-1</sup>, f: OTC, 0.6 mL h<sup>-1</sup>, g: OTC, 0.2 mL h<sup>-1</sup>, h: OTC, 0.08 mL h<sup>-1</sup>, i: CTC, 3.0 mL h<sup>-1</sup>, j: CTC, 0.6 mL h<sup>-1</sup>, k: CTC, 0.2 mL h<sup>-1</sup>) Short-dashed lines indicate the expected break-through curve for a tracer (CI). Short-dashed and solid lines represent the modeled break-through curve by fitting only the retardation factor and both the retardation factor and the degradation rate constant in equation 3, respectively. Long-dashed lines indicate the theoretical break-through curve for a tracer.

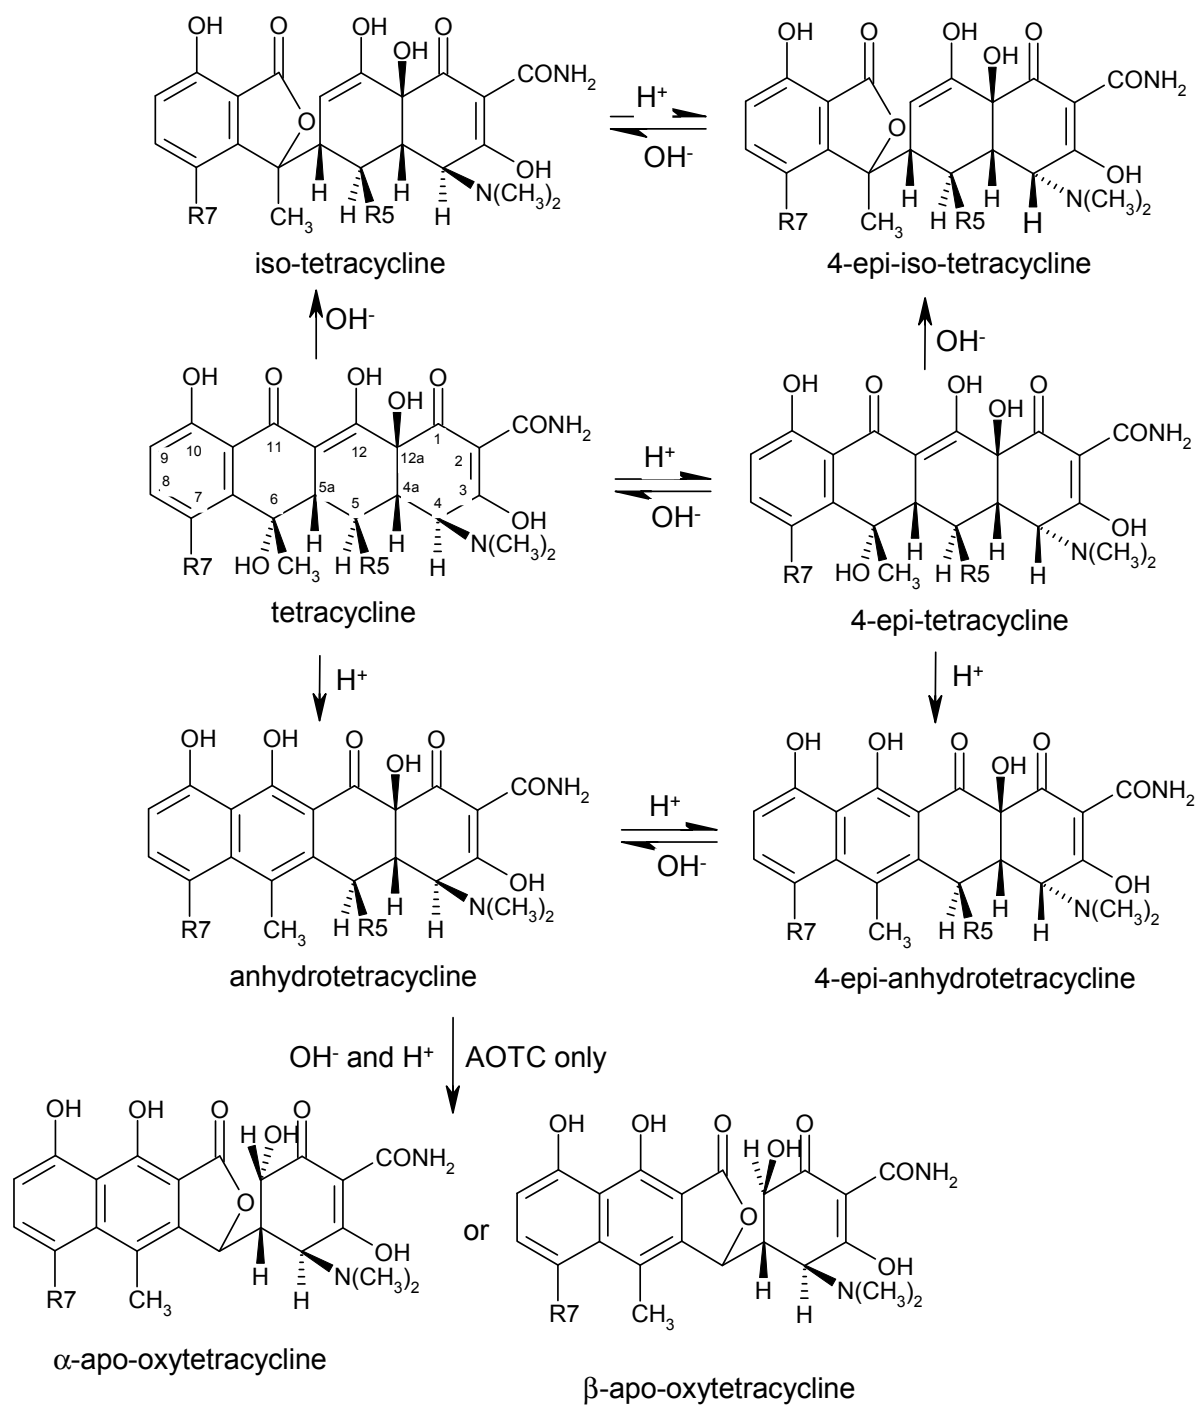

**Figure ESI4.** The major transformation pathways of tetracyclines. Tetracycline and its transformation products: R5 = H, R7 = H; oxitetracycline and its transformation products: R5 = OH, R7 = H; chlortetracycline and its transformation products: R5 = H, R7 = Cl.

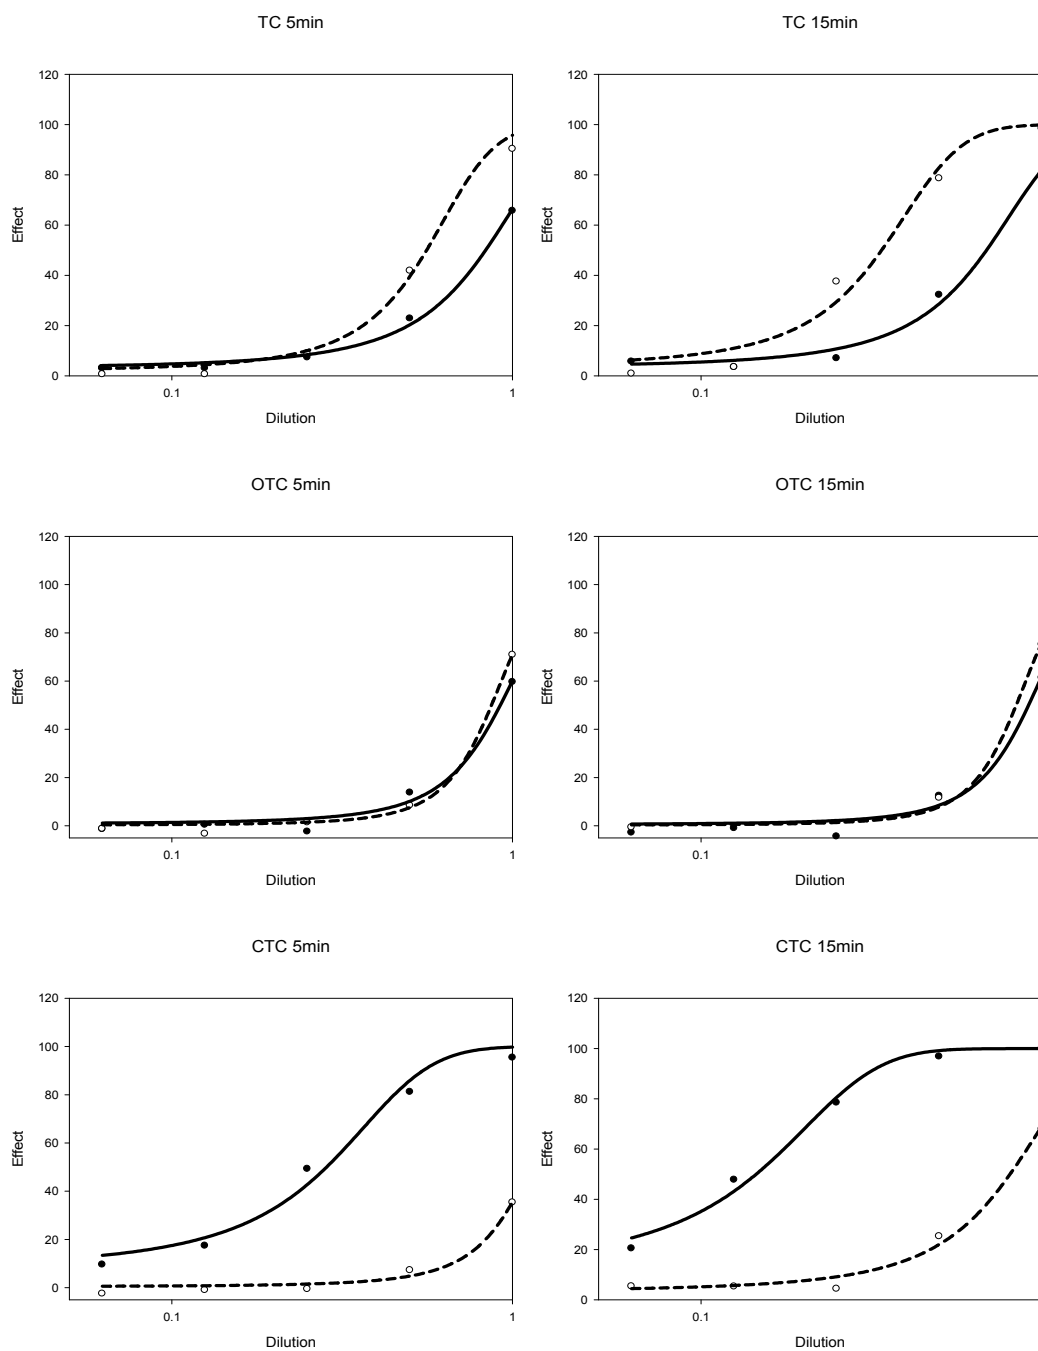

**Figure ES15.** Bioluminescence inhibition of the three tetracycline effluents (flow rate = 0.08 mL h<sup>-1</sup>) in *Vibrio fischeri*. Filled and open circles represent the column influents and the effluents, respectively. Solids lines and dashed lines are best-fit sigmoidal curves for the determination of ED<sub>50</sub> for the influents and effluents.
